# Supplementary material
Source: PubMed Central journal article supplement (PMC6326776)

**SUPPLEMENTAL FIGURES**

**Supplemental Figure 1. GM-CSF Ab in IBD.** Serum GM-CSF autoantibody (GM-CSF Ab) concentration was determined by ELISA recognizing non-glycosylated GM-CSF in the pediatric (A1) and adult (A2) onset CD patients, UC patients, and healthy controls (CTRL) summarized in Table I (n = 354 IBD and 108 controls). \* $p < 0.01$  vs. A1CTRL and A1UC, ^ $p < 0.01$  vs. A2 CD, \*\* $p < 0.01$  vs. A2 CTRL. Data are shown as the median(range).

**Supplemental Figure 2. GM-CSF Ab and CD Genotype and Duration of Disease.** Serum GM-CSF autoantibody (GM-CSF Ab) concentration was determined by ELISA recognizing glycosylated GM-CSF in the pediatric (A1) and adult (A2) onset CD patients summarized in Table I (n = 354 IBD and 108 controls). A) The genotype for the indicated CD susceptibility genetic polymorphisms was determined. The median(range) GM-CSF Ab concentration is shown as a function of genotype. \* $p < 0.01$  vs. *IRGM* SNP- CD. B) Serum GM-CSF Ab concentration is shown as a function of duration of disease in the pediatric onset CD patients. C) Serum GM-CSF Ab concentration is shown as a function of duration of disease in the adult onset CD patients.

**Supplemental Figure 3. Frequency of Ileal Lamina Propria Macrophages and T Lymphocytes in Experimental Ileitis and Newly Diagnosed CD.** The frequency of F4/80+ macrophages and CD3+ T lymphocytes was determined in ileal sections from the murine and human groups as indicated. WT: wild type, GMKO: *gm-csf* deficient, C15KO: *card15* deficient, PIR: received piroxicam, 200 ppm, in the chow, GM-CSF Ab: received neutralizing GM-CSF antibody, 50 mcg IP. CON: healthy human controls, CD: newly diagnosed CD. Images representative of at least four per group are shown. \* $p < 0.001$  vs. control with same genotype; \*\* $p = 0.06$  vs. C15KO control.

## SUPPLEMENTAL TABLE

Supplemental Table I. Patient Characteristics.

| <b>Diagnosis</b>      | <b>n</b> | <b>Age<br/>Median (range)</b> | <b>Gender<br/>(male)</b> | <b>Duration<br/>Median(range)</b> | <b>Stricturing/Penetrating<br/>Behavior</b> |
|-----------------------|----------|-------------------------------|--------------------------|-----------------------------------|---------------------------------------------|
| A1 Ileal CD           | 24       | 13(5,18)                      | 79                       | 2(0,8)                            | 46                                          |
| A1 Ileo-colonic CD    | 132      | 12(1,19)                      | 59                       | 2(0,16)                           | 34                                          |
| A1 Colon-only CD      | 73       | 12(2,18)                      | 63                       | 3(0,25)                           | 12                                          |
| A1 Ulcerative Colitis | 43       | 12(2,16)                      | 61                       | 4(1,16)                           | not applicable                              |
| A2 Ileal CD           | 17       | 30(23,53)                     | 53                       | 7(1,23)                           | 76                                          |
| A2 Ileo-colonic CD    | 28       | 36(21,68)                     | 46                       | 13(2,23)                          | 68                                          |
| A2 Colon-only CD      | 12       | 41(24,64)                     | 42                       | 11(2,37)                          | 33                                          |
| A2 Ulcerative Colitis | 25       | 38(21,71)                     | 64                       | 8(1,21)                           | not applicable                              |
| CD Subset*            | 21       | 12(4,17)                      | 76                       | 2(1,8)                            | 33                                          |

\*subset of CD patients used to determine neutrophil functional data;

male gender and stricturing/penetrating behavior are relative frequencies, disease duration is in years.

Fig S1

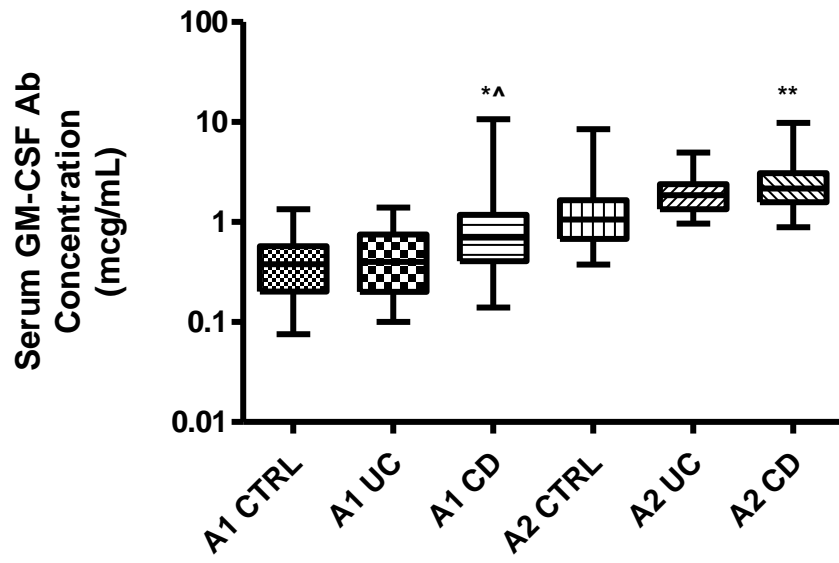

Fig S2

A

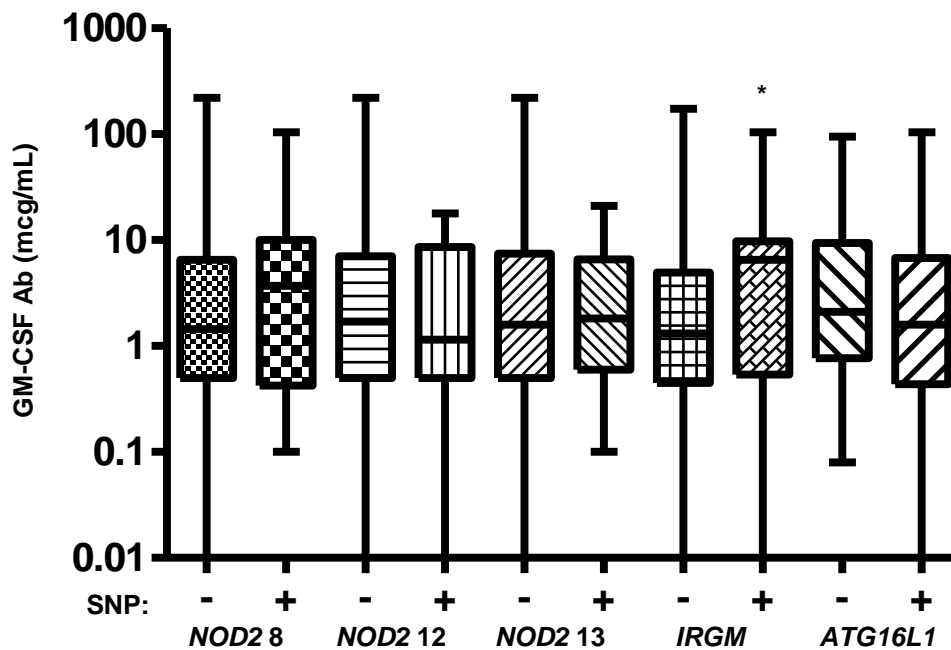

B

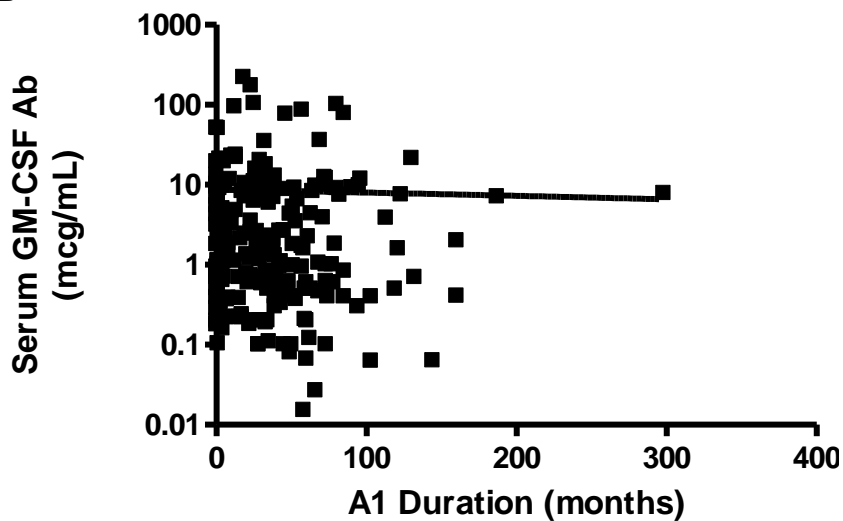

C

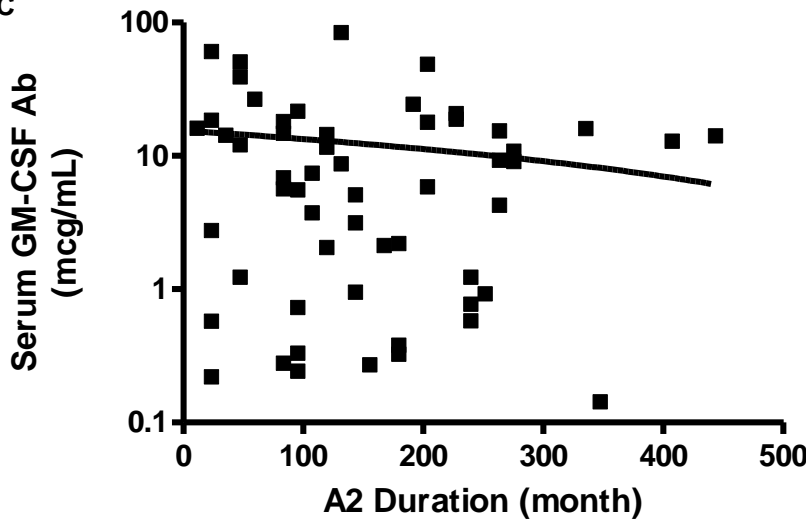

Fig S3

A

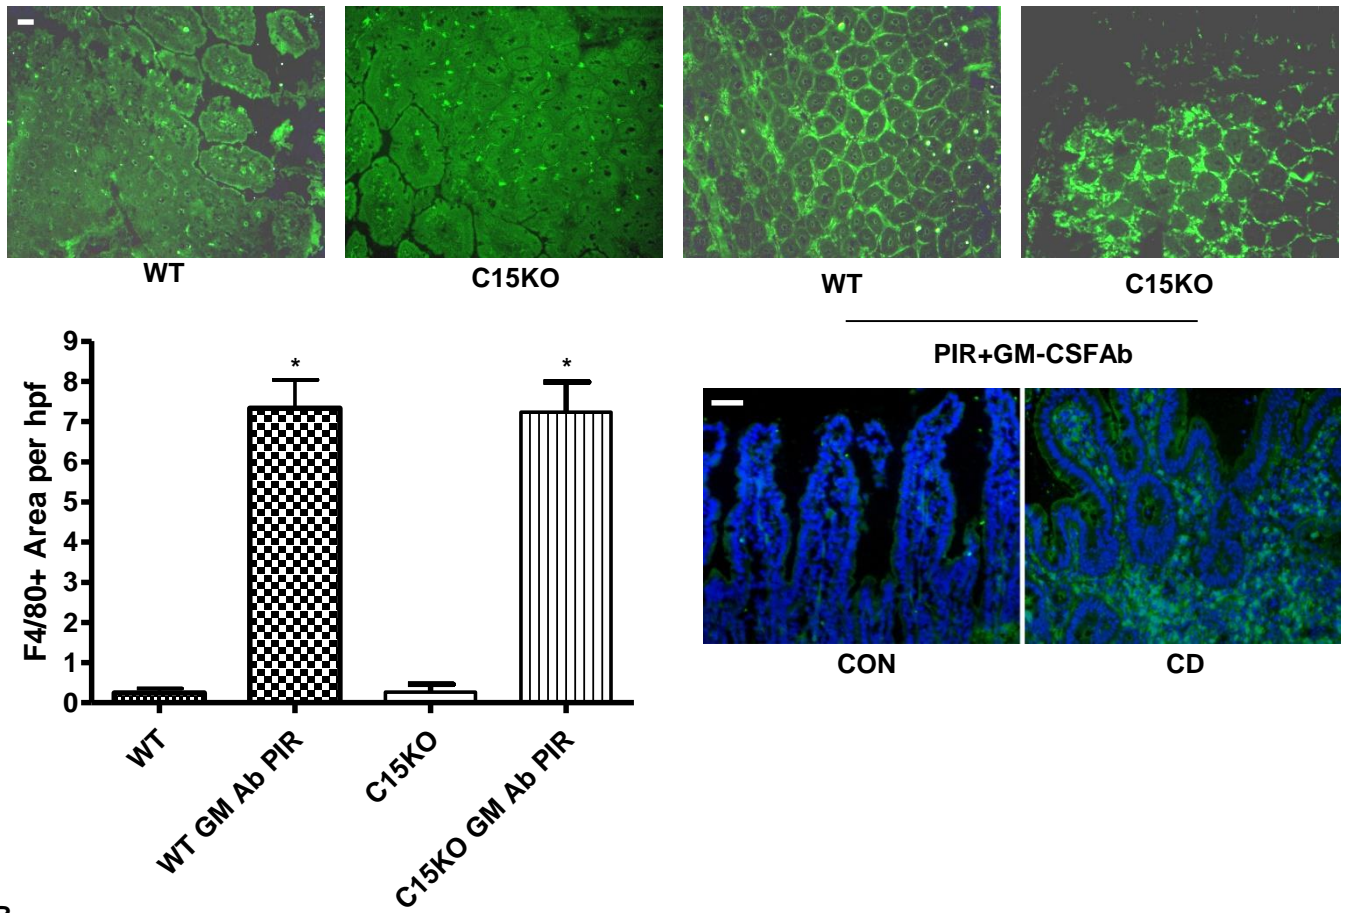

B

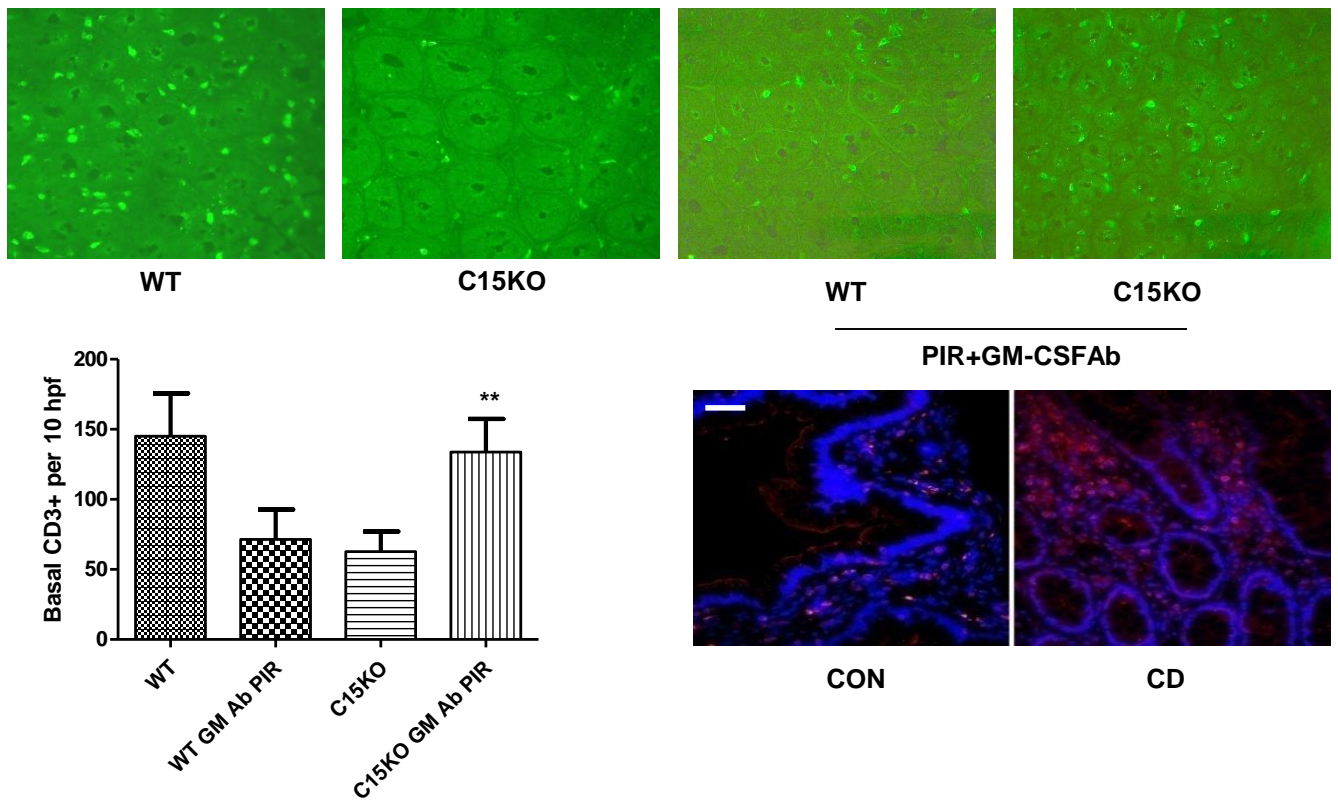

Supplement: NIHMS1003714-supplement-1.pdf [file NIHMS1003714-supplement-1.pdf]
